# Supplementary material for: Space–time dynamics of a triple epidemic: dengue, chikungunya and Zika clusters in the city of Rio de Janeiro
Source: PubMed Central journal article supplement (PMC6790786; doi:10.1098/rspb.2019.1867), 2019-10-09
Supplement: rspb20191867supp1.pdf [file rspb20191867supp1.pdf]

# Space-time dynamics of a triple epidemic: dengue, chikungunya, and Zika clusters in the city of Rio de Janeiro

Laís Picinini Freitas, Oswaldo Gonçalves Cruz, Rachel Lowe, Marília Sá Carvalho

Proceedings of the Royal Society B

DOI: 10.1098/rspb.2019.1867

## Supplementary Material

**Figure S1. Rio de Janeiro city population density (inhabitants/m<sup>2</sup>) (A) and green areas (B), by region and neighbourhood, 2010.**

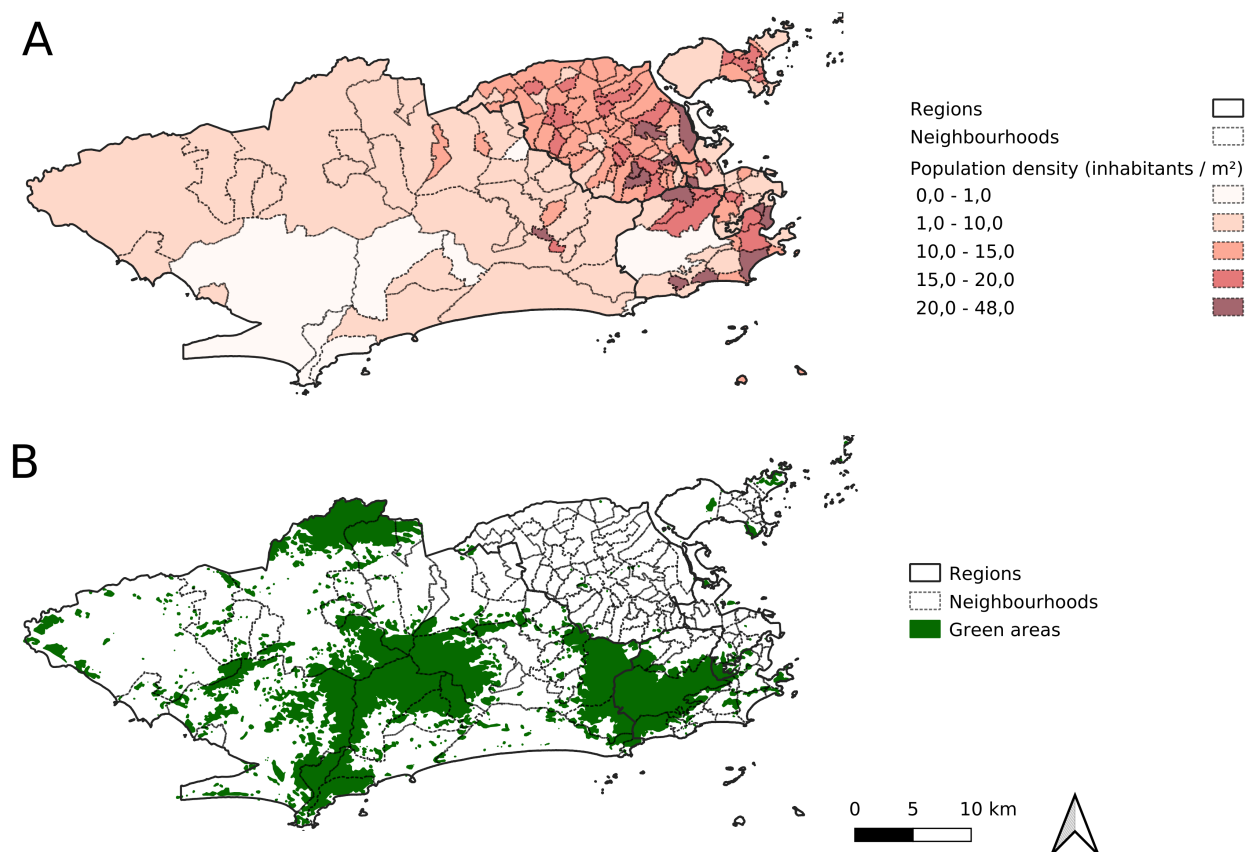

Maps were produced using QGIS (version 3.8.1). Sources: The Brazilian Institute of Geography and Statistics (IBGE) and Instituto Pereira Passos (IPP), Brazil.

**Figure S2. Detection of Zika cases clusters in Rio de Janeiro city, Brazil, according to different temporal and spatial parameters using SaTScan™ (version 9.5), 2015-2016. A) Default parameters. B) Maximum temporal window of 1 week. C) Maximum temporal window of 4 weeks. D) Maximum temporal window of 4 weeks and maximum of 5% of population at risk. E) Maximum temporal window of 4 weeks and maximum of 1% of population at risk.**

A

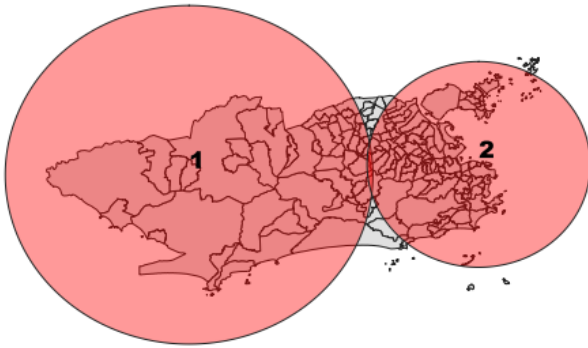

B

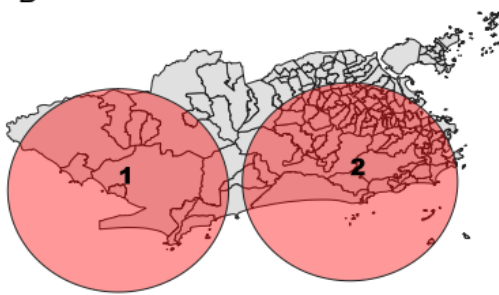

C

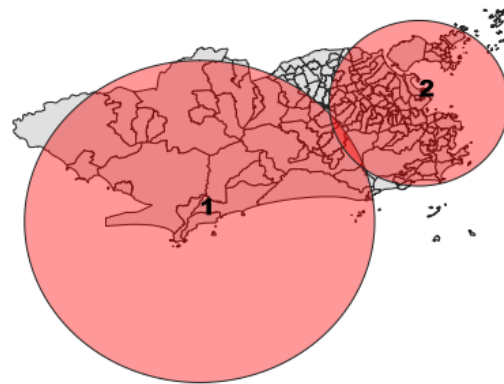

D

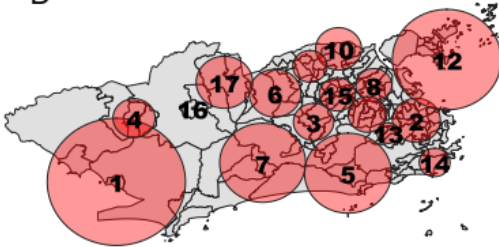

E

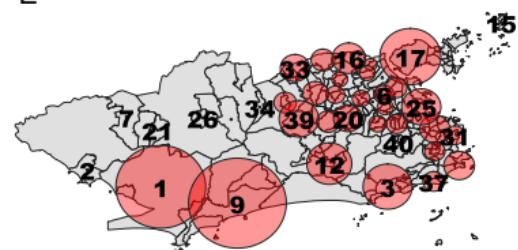

Note: This is the standard output of results from SaTScan™. A neighbourhood was considered part of a cluster if its centroid was inside the base of the cylinder (the circle, in this figure). Maps were produced using QGIS (version 3.8.1). Sources: Sistema de Vigilância de Agravos de Notificação (SINAN) – Ministry of Health, Brazil, and Instituto Pereira Passos (IPP), Brazil.

**Table S1. Characteristics of dengue clusters between epidemiological weeks 31-2015 and 52-2016, Rio de Janeiro city, Brazil. Clusters are ordered according to the maximum log likelihood ratio, with 1 being the most likely cluster.**

| <b>Cluster</b> | <b>Time period (week)</b> | <b>Population</b> | <b>Observed cases</b> | <b>Relative risk</b> |
|----------------|---------------------------|-------------------|-----------------------|----------------------|
| 1              | 10 to 14-2016             | 312654            | 1082                  | 15.66                |
| 2              | 12 to 16-2016             | 12556             | 431                   | 151.90               |
| 3              | 13 to 17-2016             | 296392            | 911                   | 13.82                |
| 4              | 13 to 17-2016             | 243125            | 650                   | 11.91                |
| 5              | 13 to 17-2016             | 105515            | 458                   | 19.21                |
| 6              | 12 to 16-2016             | 290744            | 613                   | 9.37                 |
| 7              | 13 to 17-2016             | 283141            | 447                   | 6.97                 |
| 8              | 13 to 17-2016             | 278828            | 377                   | 5.96                 |
| 9              | 12 to 16-2016             | 304235            | 359                   | 5.19                 |
| 10             | 12 to 16-2016             | 217333            | 232                   | 4.68                 |
| 11             | 10 to 14-2016             | 313429            | 264                   | 3.69                 |
| 12             | 13 to 17-2016             | 94626             | 143                   | 6.61                 |
| 13             | 16 to 20-2016             | 225030            | 193                   | 3.75                 |
| 14             | 14 to 18-2016             | 3361              | 34                    | 44.10                |
| 15             | 14 to 18-2016             | 315314            | 197                   | 2.73                 |
| 16             | 52-2015 to 4-2016         | 101443            | 89                    | 3.83                 |
| 17             | 12 to 16-2016             | 311869            | 151                   | 2.11                 |
| 18             | 12 to 14-2016             | 69356             | 29                    | 3.64                 |

Figure S3. Relative risks of clusters of (A) dengue, (B) chikungunya, and (C) Zika cases, detected between epidemiological weeks 31-2015 and 52-2016 in Rio de Janeiro city, Brazil.

A

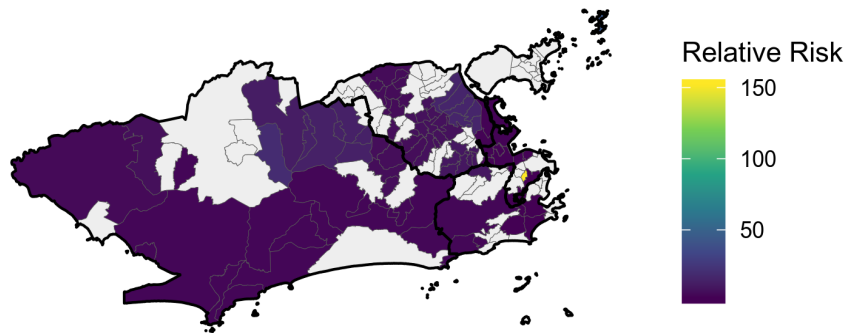

B

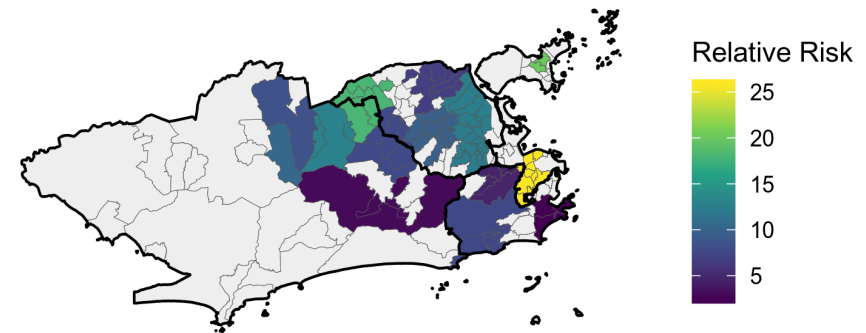

C

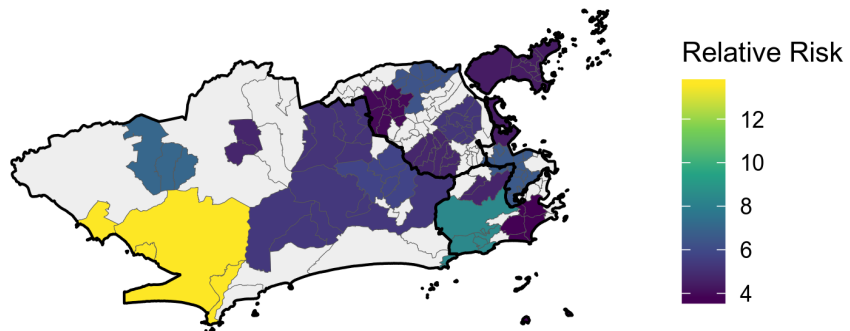

Maps were created using R (version 3.4.4) with ggplot2 package (version 3.1.0). Sources: Sistema de Vigilância de Agravos de Notificação (SINAN) – Ministry of Health, Brazil, and Instituto Pereira Passos (IPP), Brazil.

Figure S4. Week of cluster detection for (A) dengue, (B) chikungunya, and (C) Zika cases, in Rio de Janeiro city, Brazil. Red circles indicate the first cluster in time for each disease.

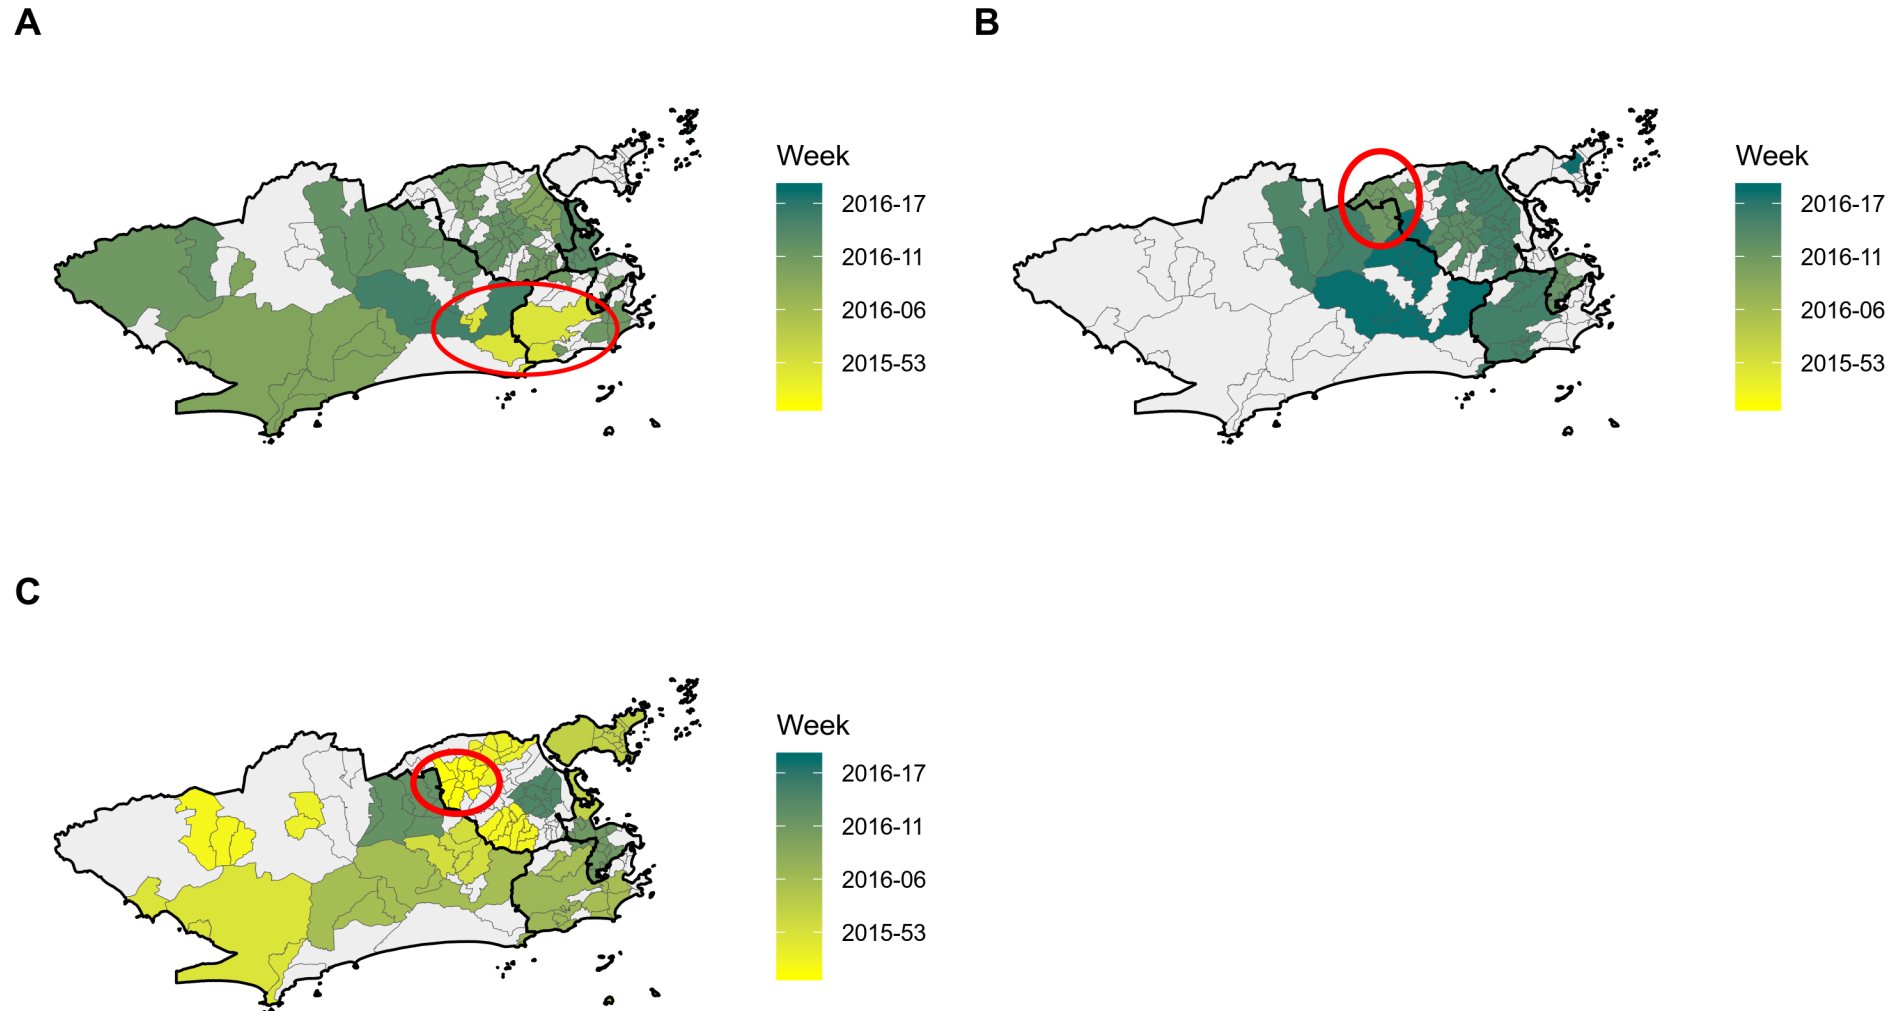

Maps were created using R (version 3.4.4) with ggplot2 package (version 3.1.0). Sources: Sistema de Vigilância de Agravos de Notificação (SINAN) – Ministry of Health, Brazil, and Instituto Pereira Passos (IPP), Brazil.

**Table S2. Characteristics of chikungunya clusters between epidemiological weeks 31-2015 and 52-2016, Rio de Janeiro city, Brazil. Clusters are ordered according to the maximum log likelihood ratio, with 1 being the most likely cluster.**

| <b>Cluster</b> | <b>Time period (week)</b> | <b>Population</b> | <b>Observed cases</b> | <b>Relative risk</b> |
|----------------|---------------------------|-------------------|-----------------------|----------------------|
| 1              | 13 to 17-2016             | 154001            | 453                   | 25.77                |
| 2              | 12 to 16-2016             | 210786            | 434                   | 18.00                |
| 3              | 16 to 20-2016             | 312654            | 448                   | 12.53                |
| 4              | 16 to 20-2016             | 314738            | 442                   | 12.28                |
| 5              | 16 to 20-2016             | 268781            | 397                   | 12.87                |
| 6              | 14 to 18-2016             | 296540            | 332                   | 9.71                 |
| 7              | 19 to 23-2016             | 284673            | 256                   | 7.75                 |
| 8              | 15 to 19-2016             | 243125            | 237                   | 8.40                 |
| 9              | 16 to 20-2016             | 309599            | 243                   | 6.76                 |
| 10             | 16 to 20-2016             | 105515            | 128                   | 10.38                |
| 11             | 16 to 20-2016             | 314444            | 171                   | 4.66                 |
| 12             | 16 to 20-2016             | 119297            | 105                   | 7.52                 |
| 13             | 19 to 20-2016             | 54415             | 32                    | 19.99                |
| 14             | 19 to 23-2016             | 277454            | 98                    | 3.01                 |
| 15             | 17 to 20-2016             | 251142            | 57                    | 2.57                 |

**Table S3. Characteristics of Zika clusters between epidemiological weeks 31-2015 and 52-2016, Rio de Janeiro city, Brazil. Clusters are ordered according to the maximum log likelihood ratio, with 1 being the most likely cluster.**

| <b>Cluster</b> | <b>Time period (week)</b> | <b>Population</b> | <b>Observed cases</b> | <b>Relative risk</b> |
|----------------|---------------------------|-------------------|-----------------------|----------------------|
| 1              | 52-2015 to 4-2016         | 179689            | 742                   | 13.57                |
| 2              | 49-2015 to 1-2016         | 236282            | 509                   | 7.03                 |
| 3              | 12 to 16-2016             | 247427            | 497                   | 6.55                 |
| 4              | 1 to 5-2016               | 309349            | 545                   | 5.75                 |
| 5              | 13 to 17-2016             | 307234            | 488                   | 5.18                 |
| 6              | 50-2015 to 1-2016         | 277724            | 404                   | 6.31                 |
| 7              | 7 to 11-2016              | 119297            | 307                   | 8.36                 |
| 8              | 49-2015 to 1-2016         | 294447            | 429                   | 4.74                 |
| 9              | 6 to 10-2016              | 231774            | 379                   | 5.32                 |
| 10             | 15 to 18-2016             | 297833            | 359                   | 5.22                 |
| 11             | 48 to 52-2015             | 298052            | 362                   | 3.94                 |
| 12             | 3 to 7-2016               | 233051            | 315                   | 4.39                 |
| 13             | 6 to 10-2016              | 203170            | 293                   | 4.68                 |
| 14             | 6 to 10-2016              | 306508            | 357                   | 3.78                 |
| 15             | 50-2015 to 2-2016         | 72058             | 105                   | 4.71                 |

**Table S4. Characteristics of clusters of dengue, chikungunya, and Zika detected using multivariate scan statistic, between epidemiological weeks 31-2015 and 52-2016, Rio de Janeiro city, Brazil. Clusters are ordered according to the maximum log likelihood ratio, with 1 being the most likely cluster.**

| <b>Cluster</b> | <b>Time period<br/>(week)</b> | <b>Population</b> | <b>Dengue<br/>relative risk</b> | <b>Chikungunya<br/>relative risk</b> | <b>Zika<br/>relative risk</b> |
|----------------|-------------------------------|-------------------|---------------------------------|--------------------------------------|-------------------------------|
| 1              | 12 to 16-2016                 | 154001            | 21.16                           | 25.30                                | 7.66                          |
| 2              | 13 to 17-2016                 | 307234            | 13.50                           | 8.04                                 | 5.18                          |
| 3              | 10 to 14-2016                 | 312654            | 15.66                           | 2.86                                 | 3.27                          |
| 4              | 12 to 16-2016                 | 290744            | 9.37                            | 6.81                                 | 4.11                          |
| 5              | 52-2015 to 4-2016             | 179689            | 1.28                            | NA                                   | 13.57                         |
| 6              | 13 to 17-2016                 | 243125            | 11.91                           | 5.32                                 | 1.18                          |
| 7              | 14 to 18-2016                 | 105515            | 19.04                           | 7.93                                 | 1.93                          |
| 8              | 13 to 17-2016                 | 306968            | 6.27                            | 8.86                                 | 3.58                          |
| 9              | 12 to 16-2016                 | 285585            | 5.22                            | 6.84                                 | 3.90                          |
| 10             | 49-2015 to 1-2016             | 236282            | NA                              | NA                                   | 7.03                          |
| 11             | 17 to 21-2016                 | 309599            | 4.61                            | 6.14                                 | 1.40                          |
| 12             | 1 to 5-2016                   | 301626            | 2.38                            | NA                                   | 4.98                          |
| 13             | 7 to 11-2016                  | 119297            | 1.09                            | NA                                   | 8.36                          |
| 14             | 3 to 7-2016                   | 233051            | NA                              | NA                                   | 4.39                          |
| 15             | 6 to 10-2016                  | 306508            | 1.02                            | NA                                   | 3.78                          |
| 16             | 50-2015 to 2-2016             | 72058             | 1.33                            | NA                                   | 4.71                          |



**Figure S5. (A) Minimum temperature (°C) and (B) precipitation (mm/month) in Rio de Janeiro city, Brazil, at the monthly time scale from January 2001 to December 2017.**

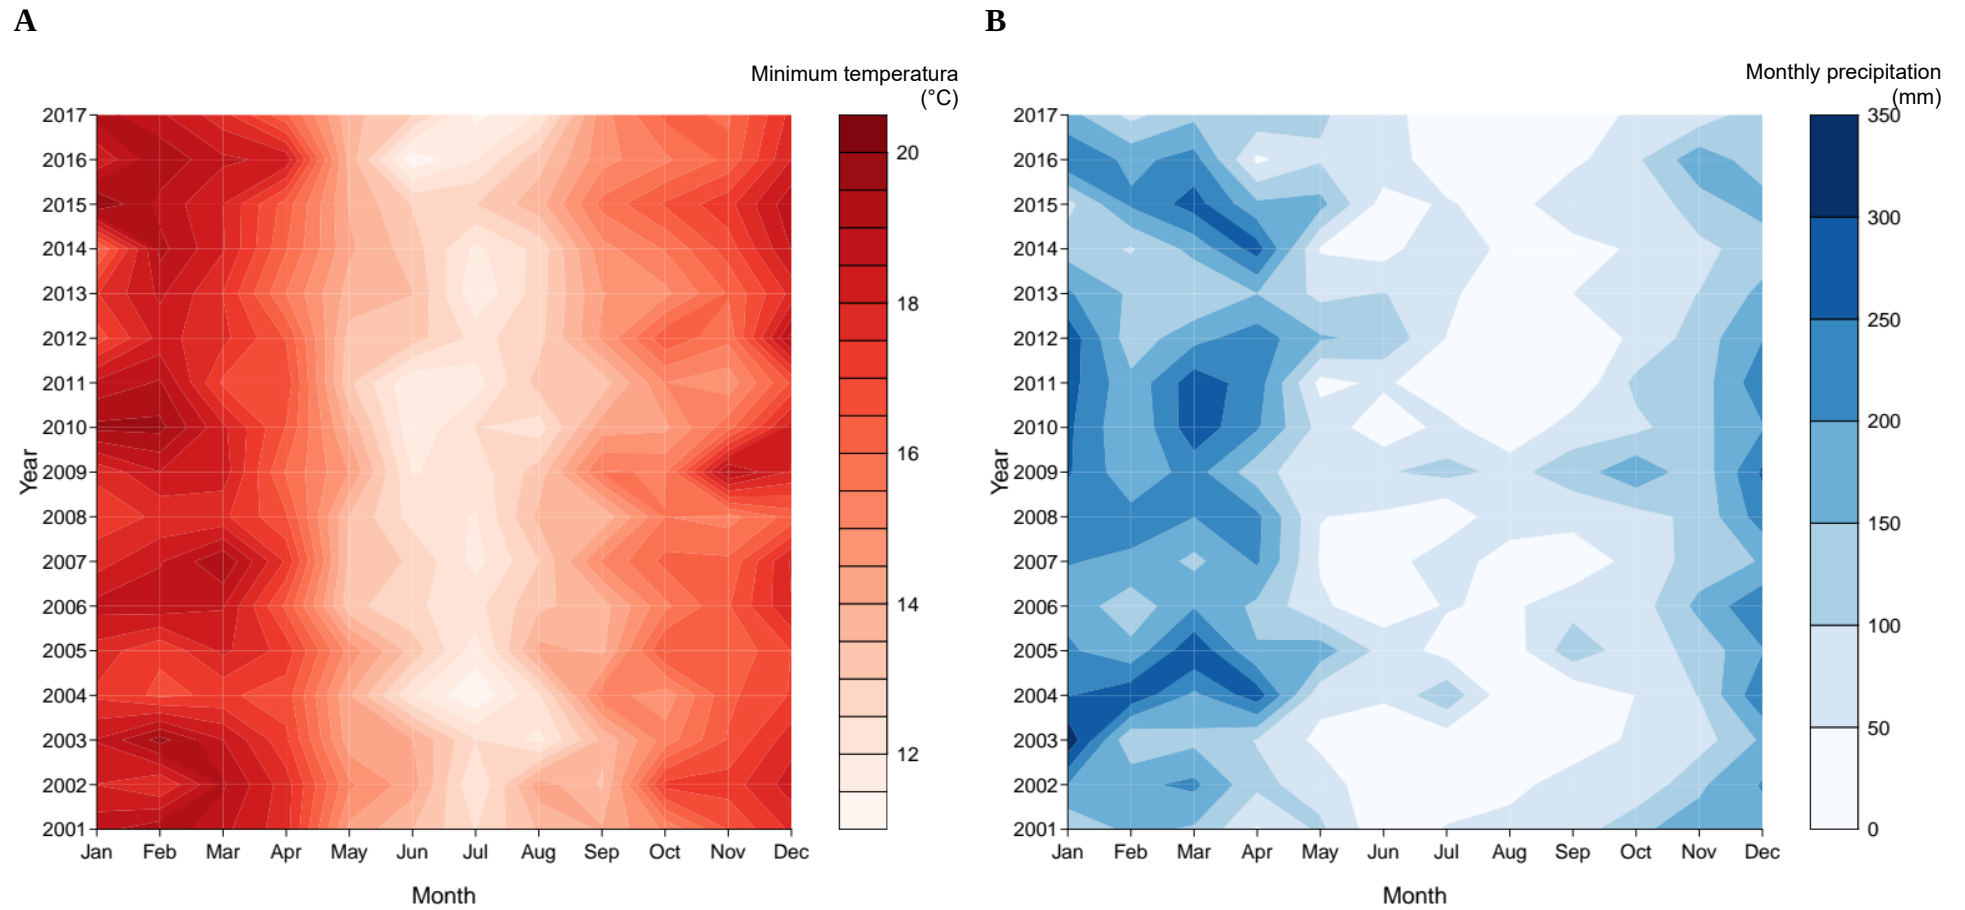

Figures were created using R (version 3.5.2). Source: Abatzoglou, J.T., S.Z. Dobrowski, S.A. Parks, K.C. Hegewisch, 2018, Terraclimate, a high-resolution global dataset of monthly climate and climatic water balance from 1958-2015, Scientific Data.
